# Supplementary material for: Octacalcium Phosphate-Laden Hydrogels on 3D-Printed Titanium Biomaterials Improve Corrosion Resistance in Simulated Biological Media
Source: MDPI journal article supplement (doi:10.3390/ijms241713135), 2023-08-24
Supplement: s1 [file s1]

### Suplammetry information

## **Octacalcium Phosphate-Laden Hydrogels on 3D-Printed Titanium Biomaterials Improve Corrosion Resistance in Simulated Biological Media**

Aydin Bordbar Khiabani<sup>1,\*</sup>, Ilijana Kovrljija<sup>2,3</sup>, Janis Locs<sup>2,3</sup>, Dagnija Loca<sup>2,3</sup>, Michael Gasik<sup>1</sup>

<sup>1</sup>Department of Chemical and Metallurgical Engineering, School of Chemical Engineering, Aalto University Foundation, 02150 Espoo, Finland

<sup>2</sup>Rudolfs Cimdins Riga Biomaterials Innovations and Development Centre of RTU, Institute of General 7 Chemical Engineering, Faculty of Materials Science and Applied Chemistry, Riga Technical University, 8 Riga, Latvia

<sup>3</sup>Baltic Biomaterials Centre of Excellence, Headquarters at Riga Technical University, Riga, Latvia

\*Correspondence: [aydin.bordbarkhiabani@aalto.fi](mailto:aydin.bordbarkhiabani@aalto.fi)

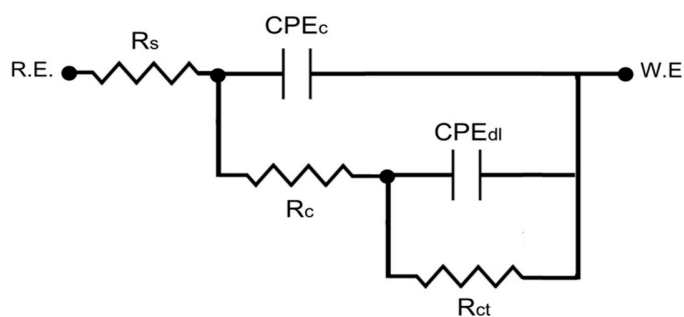

Figure S1. Equivalent circuit model for hydrogel coatings on 3D-printed Ti layers.

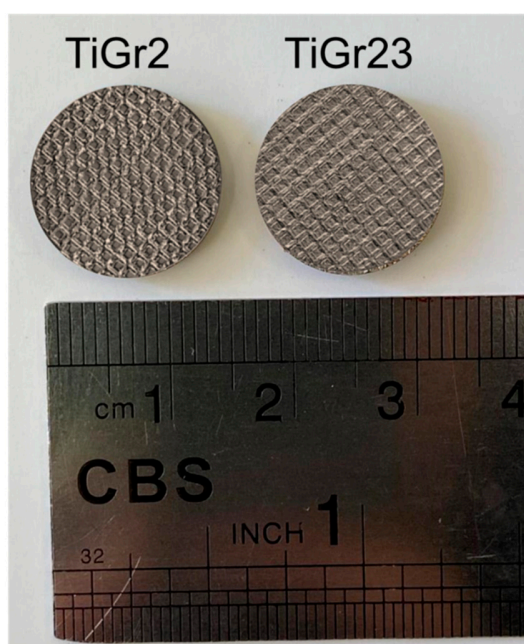

Figure S2. Camera image of the different 3D-printed Ti layers on their counterpart's substrates.

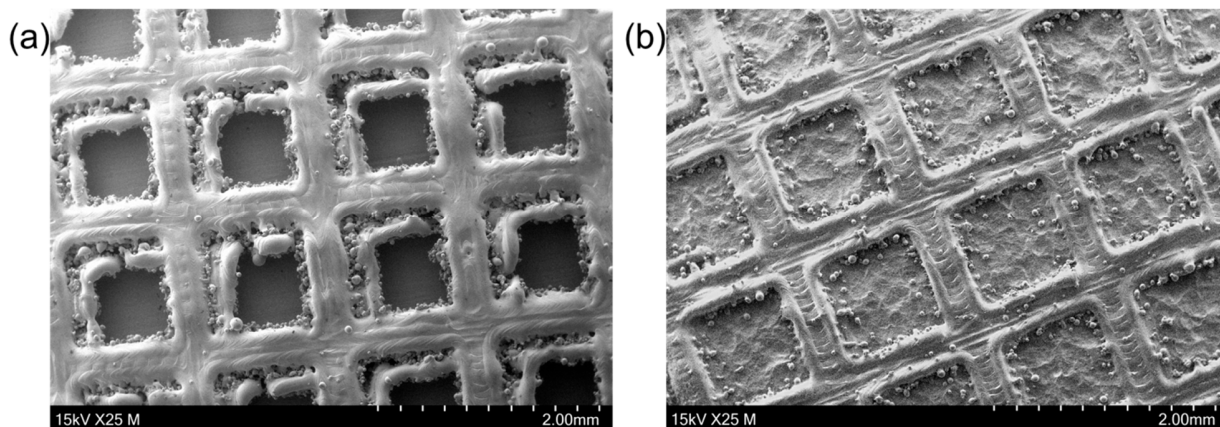

Figure S3. SEM images of the 3D-printed (a) TiGr2, and (b) TiGr23 layers on their counterpart's substrates.

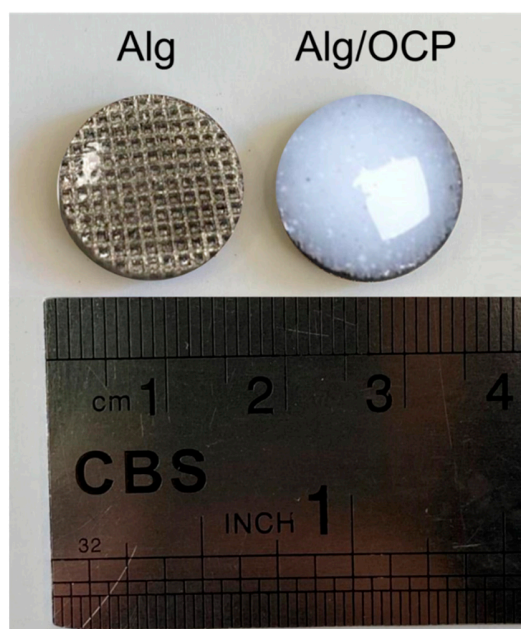

Figure S4. Camera image of the different hydrogel coatings on 3D-printed Ti Gr23 layers.

Supplementary Table S1. Potentiodynamic polarization parameters of the hydrogel coatings on 3D-printed Ti Gr2 and Ti Gr23 substrates (shaded cells) in comparison with uncoated substrates from [14] in different simulated conditions.

| Simulated conditions | Specimens          | $E_{\text{corr}}$<br>(V vs. Ag/AgCl) | $\beta_a$<br>(V·dec <sup>-1</sup> ) | $-\beta_c$<br>(V·dec <sup>-1</sup> ) | $I_{\text{corr}}$<br>( $\mu\text{A}\cdot\text{cm}^{-2}$ ) | $R_p$<br>( $\text{k}\Omega\cdot\text{cm}^2$ ) |
|----------------------|--------------------|--------------------------------------|-------------------------------------|--------------------------------------|-----------------------------------------------------------|-----------------------------------------------|
| Normal               | 3D Ti2 [14]        | -0.425±0.160                         | -                                   | 0.450±0.140                          | 0.54±0.05                                                 | -                                             |
|                      | 3D Ti23 [14]       | -0.537±0.185                         | -                                   | 0.374±0.116                          | 0.23±0.04                                                 | -                                             |
|                      | Alg on 3D Ti2      | -0.222±0.151                         | -                                   | 0.562±0.209                          | 0.37±0.08                                                 | -                                             |
|                      | Alg/OCP on 3D Ti2  | -0.210±0.115                         | -                                   | 0.421±0.105                          | 0.09±0.02                                                 | -                                             |
|                      | Alg on 3D Ti23     | -0.220±0.127                         | -                                   | 0.389±0.163                          | 0.12±0.01                                                 | -                                             |
|                      | Alg/OCP on 3D Ti23 | -0.214±0.158                         | -                                   | 0.412±0.50                           | 0.02±0.008                                                | -                                             |
| Inflammatory         | 3D Ti2 [14]        | 0.231±0.033                          | 0.848±0.144                         | 0.429±0.162                          | 35.12±1.39                                                | 3.48±0.47                                     |
|                      | 3D Ti23 [14]       | 0.248±0.047                          | 0.718±0.100                         | 0.568±0.101                          | 20.37±0.76                                                | 5.95±0.41                                     |
|                      | Alg on 3D Ti2      | 0.233±0.111                          | 0.715±0.079                         | 0.506±0.109                          | 28.08±0.29                                                | 4.52±0.15                                     |
|                      | Alg/OCP on 3D Ti2  | 0.251±0.124                          | 0.692±0.263                         | 0.551±0.177                          | 3.85±0.52                                                 | 34.19±0.30                                    |
|                      | Alg on 3D Ti23     | 0.276±0.33                           | 0.631±0.091                         | 0.574±0.123                          | 17.49±1.01                                                | 6.53±0.42                                     |
|                      | Alg/OCP on 3D Ti23 | 0.282±0.082                          | 0.782±0.205                         | 0.473±0.186                          | 0.95±0.11                                                 | 133.12±1.44                                   |
| Severe inflammatory  | 3D Ti2 [14]        | 0.120±0.066                          | 0.787±0.185                         | 0.422±0.129                          | 67.18±1.80                                                | 2.96±0.16                                     |
|                      | 3D Ti23[14]        | 0.143±0.011                          | 0.817±0.118                         | 0.532±0.137                          | 45.05±2.69                                                | 3.69±0.13                                     |
|                      | Alg on 3D Ti2      | 0.126±0.005                          | 0.809±0.152                         | 0.462±0.181                          | 55.75±0.40                                                | 2.26±0.36                                     |
|                      | Alg/OCP on 3D Ti2  | 0.149±0.143                          | 0.794±0.144                         | 0.577±0.150                          | 32.19±3.22                                                | 13.33±0.43                                    |
|                      | Alg on 3D Ti23     | 0.151±0.180                          | 0.668±0.169                         | 0.404±0.076                          | 50.20±1.05                                                | 2.15±0.15                                     |
|                      | Alg/OCP on 3D Ti23 | 0.170±0.041                          | 0.803±0.053                         | 0.550±0.149                          | 25.41±2.99                                                | 5.51±0.24                                     |

Supplementary Table S2. Parameters determined from fitting of the EIS plots of the hydrogel coatings on 3D-printed Ti Gr2 and Ti Gr23 substrates.

| Simulated conditions | Specimens          | $R_{ct}$<br>( $k\Omega \cdot cm^2$ ) | $Q_{dl}$<br>( $10^{-5}\Omega^{-1} \cdot cm^{-2} \cdot S^n$ ) | $n_1$ | $R_c$<br>( $k\Omega \cdot cm^2$ ) | $Q_c$<br>( $10^{-5}\Omega^{-1} \cdot cm^{-2} \cdot S^n$ ) | $n_2$ |
|----------------------|--------------------|--------------------------------------|--------------------------------------------------------------|-------|-----------------------------------|-----------------------------------------------------------|-------|
| Normal               | Alg on 3D Ti2      | 17.63±0.33                           | 1.16±0.29                                                    | 0.89  | 12.33±0.83                        | 1.05±0.16                                                 | 0.85  |
|                      | Alg/OCP on 3D Ti2  | 23.09±0.10                           | 1.04±0.12                                                    | 0.92  | 18.84±0.75                        | 1.02±0.14                                                 | 0.86  |
|                      | Alg on 3D Ti23     | 20.66±0.73                           | 0.84±0.15                                                    | 0.88  | 16.07±0.26                        | 1.04±0.37                                                 | 0.92  |
|                      | Alg/OCP on 3D Ti23 | 25.12±0.39                           | 0.69±0.05                                                    | 0.88  | 21.30±0.79                        | 0.96±0.08                                                 | 0.94  |
| Inflammatory         | Alg on 3D Ti2      | 8.15±0.02                            | 1.24±0.21                                                    | 0.95  | 5.40±0.60                         | 1.19±0.39                                                 | 0.87  |
|                      | Alg/OCP on 3D Ti2  | 9.86±0.80                            | 1.66±0.19                                                    | 0.93  | 7.15±0.91                         | 1.50±0.50                                                 | 0.96  |
|                      | Alg on 3D Ti23     | 10.20±0.54                           | 1.32±0.17                                                    | 0.90  | 9.06±0.27                         | 1.22±0.36                                                 | 0.83  |
|                      | Alg/OCP on 3D Ti23 | 11.54±0.04                           | 1.57±0.62                                                    | 0.95  | 9.28±0.57                         | 1.16±0.20                                                 | 0.90  |
| Severe inflammatory  | Alg on 3D Ti2      | 3.10±0.13                            | 1.43±0.20                                                    | 0.91  | 2.53±0.65                         | 1.06±0.54                                                 | 0.94  |
|                      | Alg/OCP on 3D Ti2  | 4.59±0.58                            | 1.87±0.23                                                    | 0.89  | 3.01±0.53                         | 1.73±0.17                                                 | 0.89  |
|                      | Alg on 3D Ti23     | 3.12±0.80                            | 2.09±0.39                                                    | 0.89  | 2.75±0.77                         | 1.24±0.51                                                 | 0.90  |
|                      | Alg/OCP on 3D Ti23 | 4.85±0.95                            | 1.65±0.64                                                    | 0.92  | 4.09±0.12                         | 1.13±0.28                                                 | 0.89  |
